# Supplementary material for: Pharmaceuticals and personal care products (PPCPs) are ecological disrupting compounds (EcoDC)
Source: Oxford University Press journal article supplement (doi:10.1525/elementa.252), 2017-01-01
Supplement: elementa-5-252-s1.pdf [file elementa-5-252-s1.pdf]

1 **Pharmaceuticals and personal care products (PPCPs) are ecological disrupting compounds (EcoDC)**

2 Erinn K. Richmond<sup>1\*</sup>, Michael R. Grace<sup>1</sup>, John J. Kelly<sup>2</sup>, Alexander J. Reisinger<sup>3</sup>, Emma J. Rosi<sup>3</sup>, and David  
3 M. Walters<sup>4</sup>

4 <sup>1</sup>Water Studies Centre, School of Chemistry, Monash University, Clayton Victoria, Australia

5 <sup>2</sup>Loyola University Chicago, Department of Biology, Chicago, Illinois, US

6 <sup>3</sup>Cary Institute of Ecosystem Studies, Millbrook, New York, US

7 <sup>4</sup>United States Geological Survey, Fort Collins, Colorado, US

8 \* Corresponding author: [erinn.richmond@monash.edu](mailto:erinn.richmond@monash.edu)

9

10 **Supplementary material** – *search terms in Web of Science for figure 1B and C.*

11 **Figure 1b:** Search terms referring to toxic endpoints were (TS= topic search): TS=(PPCPs or  
12 pharmaceuticals or "personal care products" or "pharmaceuticals and personal care products" or drug\*)  
13 AND TS=(eco\* or ecosystem or resistance) AND TS=(freshwater or aquat\* or stream\* or river\*) AND  
14 TS=(toxic or ecotox\* or LC50 or EC50 or lethal or Tox\*). Search terms for ecosystem disruption were: TS  
15 (PPCPs or pharmaceuticals or "personal care products" or "pharmaceuticals and personal care products"  
16 or drug\*) AND TS=(eco\* or ecosystem or resistance) AND TS=(freshwater or aquat\* or stream\* or river\*)  
17 AND TS=(behavior or behavioral or behavior or behavioral or "food web" or "food cycle" or "food chain"  
18 or "community structure" or "community composition" or "primary prod\*" or "secondary prod\*" or  
19 "ecosystem function") NOT TS=(toxic or ecotox\* or LC50 or EC50 or lethal or Tox\*) NOT TS=(sorption or  
20 fate).

21

22 **Figure 1c:** Search terms for ecosystem disruption were: TS = (PPCPs or pharmaceuticals or "personal  
23 care products" or "pharmaceuticals and personal care products" or drug\*) AND TS=(eco\* or ecosystem  
24 or resistance) AND TS=(freshwater or aquat\* or stream\* or river\*) AND TS=(behavior or behavioral or  
25 behavior or behavioral) NOT TS=(toxic or ecotox\* or LC50 or EC50 or lethal or Tox\*) NOT TS=(sorption or  
26 fate). These same criteria were used for five other areas of research, substituting behavior for the  
27 following search terms: "food web", "community structure" or "community composition", "primary  
28 prod\*" and "secondary prod\*" and "ecosystem function". In **B** and **C**, numbers above bars indicate  
29 sample size and results were limited to scientific articles with time span set to all years, searching WOS  
30 indexes = sci-expanded. Note that some overlap of studies was found, for example studies measuring  
31 effects on primary production also detected effects on ecosystem function; thus numbers do not equate  
32 to 112.

33

34

35
